# Supplementary material for: Application of Novel Anion-Exchange Blend Membranes (AEBMs) to Vanadium Redox Flow Batteries
Source: MDPI journal article supplement (doi:10.3390/membranes8020033), 2018-06-19
Supplement: s1 [file s1]

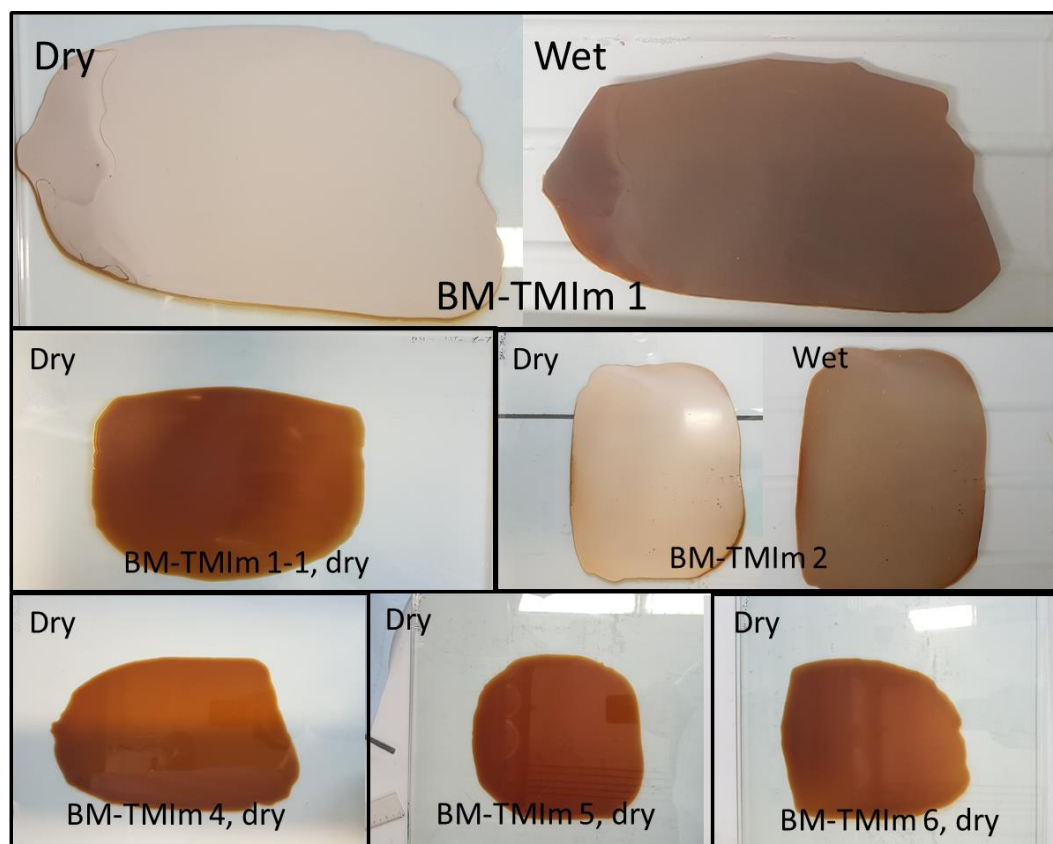

**Figure S1.** Anion exchange blend membranes tested in this study.

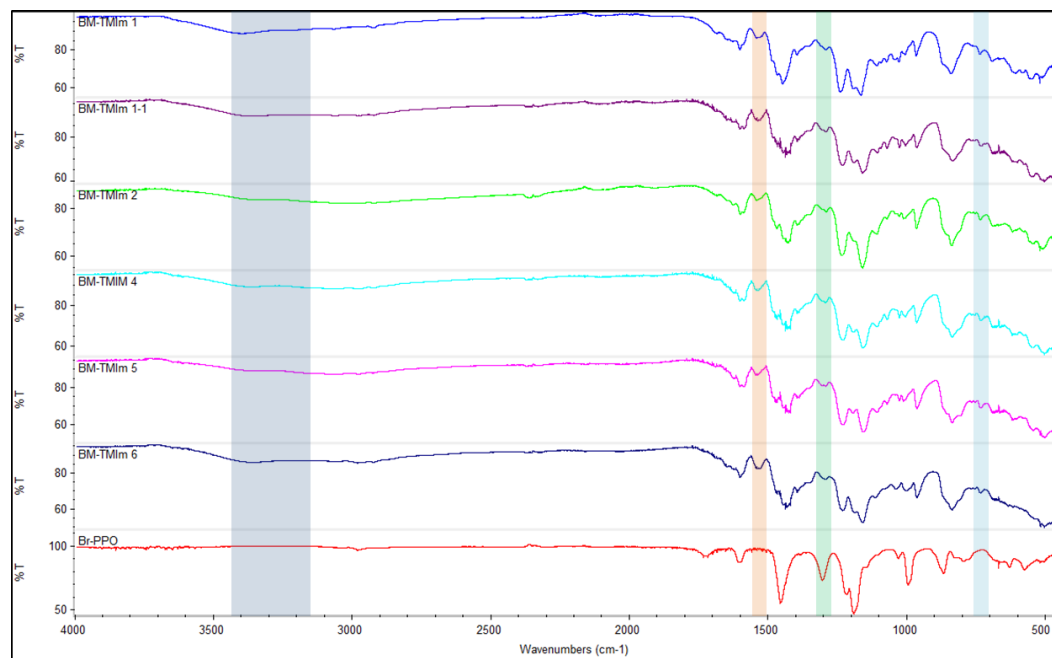

**Figure S2.** Comparison of FT-IR spectrum of AEBMs with Br-PPO.
